# Supplementary material for: Early coordinated rehabilitation in acute phase after hip fracture – a model for increased patient participation
Source: PubMed Central journal article supplement (PMC5646112; doi:10.1186/s12877-017-0640-z), 2017-10-17
Supplement: 12877_2017_640_MOESM1_ESM.pdf [file 12877_2017_640_MOESM1_ESM.pdf]

# TLS-BasicADL

Name: Peter

| PRIOR                                                                              |                                          | PRESENT                                                                             | Nr people | Aids                      | GOALS                                                                                                 |
|------------------------------------------------------------------------------------|------------------------------------------|-------------------------------------------------------------------------------------|-----------|---------------------------|-------------------------------------------------------------------------------------------------------|
|    | LYING to SITTING                         |    | 1         | band                      |                    |
|    | SITTING to LYING                         |    | 1         | band                      |                    |
|    | SIT to STAND                             |    |           | rollator                  |                    |
|    | BED to CHAIR                             |    |           | rollator                  |                    |
|    | <u>none</u> GAIT/WHEELCHAIR INDOORS      |    | 1         | rollator 50 m             |  <u>rollator</u>   |
|    | HYGIENE UPPER BODY                       |    |           |                           |                    |
|   | HYGIENE LOWER BODY                       |   | 1         |                           |                   |
|  | SHOWERING                                |  | 1         | shower seat               |                  |
|  | DRESSING UPPER BODY                      |  |           |                           |                  |
|  | DRESSING LOWER BODY                      |  | 1         | stocking aid/reacher      |                  |
|  | TOILETING                                |  | 1         |                           |                  |
|  | EATING                                   |  |           |                           |                  |
|  | <u>3 flights stick</u> STAIRS            |  | 1         | <u>1flight with stick</u> |  <u>stick</u>    |
|  | <u>rollator</u> GAIT/WHEELCHAIR OUTDOORS |  |           | <u>not tested</u>         |  <u>rollator</u> |

Physiotherapist: Karin Occupational therapist: Anna

Latest assessment

6/8
